# Supplementary material for: Simple synthesis route of mesoporous AlOOH nanofibers to enhance immune responses
Source: Royal Society of Chemistry journal article supplement (doi:10.1039/c3ra40881g), 2013-01-01
Supplement: c3ra40881g.pdf [file c3ra40881g.pdf]

## Supporting information

**Table S1.** Surface area, pore size, and pore volume of MA

| Surface area (m <sup>2</sup> /g) | Pore diameter (nm) | Pore volume (cm <sup>3</sup> /g) |
|----------------------------------|--------------------|----------------------------------|
| 209                              | 4                  | 0.24                             |

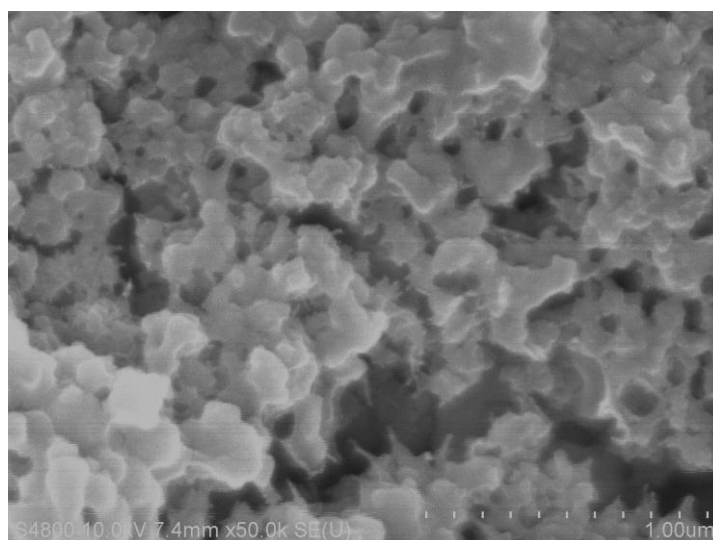

**Fig. S1** SEM images of Alum

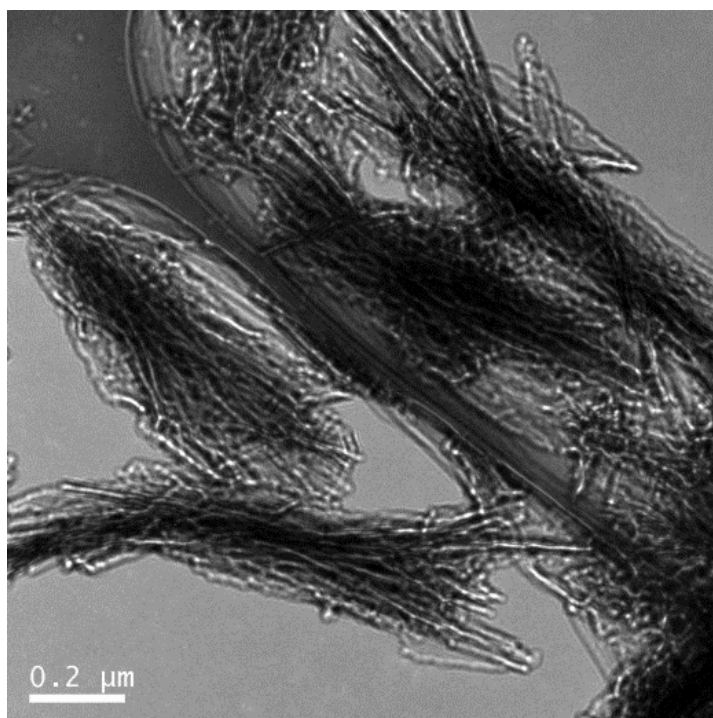

**Fig. S2** TEM images of MA

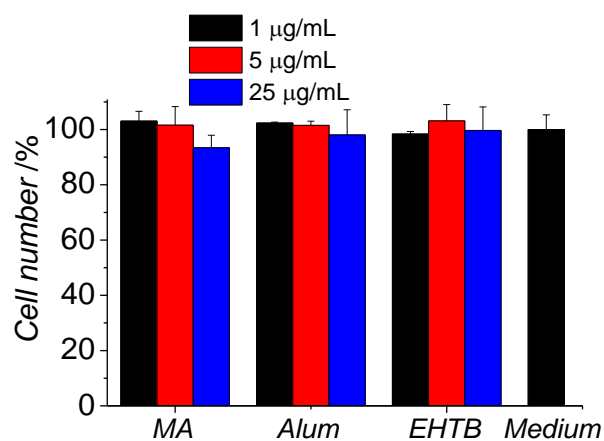

Fig. S3 Viability of the cells

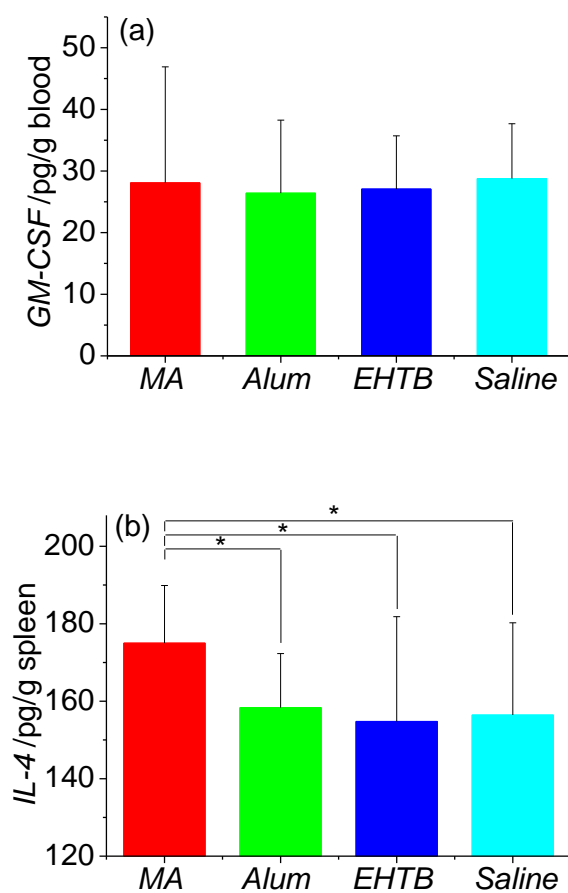

**Figure S4.** Content of GM-CSF in blood (a) and IL-4 in spleen of mice (b) after subcutaneous injection of different adjuvants (\*,  $p < 0.05$ ).
